# Supplementary material for: Association between exposure to secondhand aerosol from heated tobacco products and respiratory symptoms among current non-smokers in Japan: a cross-sectional study
Source: HighWire-hosted journal article supplement (doi:10.1136/bmjopen-2022-065322), 2023-03-01

## Supplemental materials

Yoshioka T, Shinozaki T, Hori A, Okawa S, Nakashima K, Tabuchi T. Association between exposure to secondhand-aerosol from heated tobacco products and respiratory symptoms among current nonsmokers in Japan: a cross-sectional study

**Table S1** Multivariable Poisson regression analysis using ordinal exposure variables

**Table S2** Variance inflation factors for the evaluation of multicollinearity

**Figure S1** Flow diagram of the study

Table S1 Multivariable Poisson regression analysis using ordinal exposure variables

| Characteristics                                  | N = 18,839                 | Asthma/asthma-like attacks |            |         | Persistent cough |           |         |
|--------------------------------------------------|----------------------------|----------------------------|------------|---------|------------------|-----------|---------|
|                                                  |                            | PR                         | 95% CI     | P value | PR               | 95% CI    | P value |
| Exposure to secondhand aerosols                  | Never                      |                            | Reference  |         |                  | Reference |         |
|                                                  | Rarely                     | 1.38                       | 1.01–1.88  | 0.05    | 1.48             | 1.20–1.83 | <0.001  |
|                                                  | Sometimes                  | 1.65                       | 1.30–2.11  | <0.001  | 1.31             | 1.06–1.63 | 0.01    |
|                                                  | Frequently                 | 1.44                       | 0.99–2.10  | 0.06    | 1.69             | 1.10–2.60 | 0.02    |
| Age                                              | 15–29                      | 1.36                       | 1.02–1.82  | 0.04    | 1.01             | 0.78–1.30 | 0.94    |
|                                                  | 30–44                      | 1.14                       | 0.89–1.47  | 0.28    | 1.15             | 0.96–1.38 | 0.14    |
|                                                  | 45–59                      |                            | Reference  |         |                  | Reference |         |
|                                                  | 60–80                      | 0.86                       | 0.64–1.15  | 0.31    | 1.13             | 0.91–1.40 | 0.28    |
| Sex                                              | Male                       |                            | Reference  |         |                  | Reference |         |
|                                                  | Female                     | 0.92                       | 0.74–1.15  | 0.46    | 1.11             | 0.92–1.35 | 0.27    |
| Education status                                 | High school or less        |                            | Reference  |         |                  | Reference |         |
|                                                  | College or more            | 1.04                       | 0.85–1.27  | 0.70    | 0.93             | 0.74–1.16 | 0.50    |
| Marital status                                   | Married                    |                            | Reference  |         |                  | Reference |         |
|                                                  | Not married                | 1.03                       | 0.81–1.30  | 0.82    | 0.97             | 0.77–1.21 | 0.77    |
|                                                  | Widowed/divorced           | 1.61                       | 1.04–2.48  | 0.03    | 1.39             | 0.93–2.07 | 0.11    |
| Household size                                   | Living alone               |                            | Reference  |         |                  | Reference |         |
|                                                  | Living with others         | 0.84                       | 0.60–1.19  | 0.33    | 1.14             | 0.81–1.61 | 0.47    |
| Household-equivalent income                      | 1st quartile               |                            | Reference  |         |                  | Reference |         |
|                                                  | 2nd quartile               | 0.81                       | 0.62–1.07  | 0.14    | 0.89             | 0.66–1.21 | 0.46    |
|                                                  | 3rd quartile               | 0.89                       | 0.63–1.26  | 0.51    | 0.76             | 0.56–1.05 | 0.10    |
|                                                  | 4th quartile               | 0.87                       | 0.65–1.18  | 0.38    | 0.92             | 0.69–1.22 | 0.56    |
|                                                  | Unknown/declined to answer | 0.72                       | 0.53–0.98  | 0.03    | 0.80             | 0.60–1.08 | 0.14    |
| Combustible cigarette use                        | Never                      |                            | Reference  |         |                  | Reference |         |
|                                                  | Past                       | 0.94                       | 0.71–1.22  | 0.63    | 1.17             | 0.88–1.55 | 0.29    |
| HTP use                                          | Never                      |                            | Reference  |         |                  | Reference |         |
|                                                  | Past                       | 1.70                       | 1.19–2.43  | 0.004   | 1.35             | 1.05–1.73 | 0.02    |
| Other tobacco product use                        | Never                      |                            | Reference  |         |                  | Reference |         |
|                                                  | Past                       | 1.35                       | 0.96–1.91  | 0.08    | 1.41             | 1.08–1.85 | 0.01    |
| Exposure to secondhand smoke over the past month | Absent                     |                            | Reference  |         |                  | Reference |         |
|                                                  | Present                    | 0.86                       | 0.67–1.11  | 0.25    | 0.97             | 0.78–1.21 | 0.81    |
| Asthma                                           | Absent                     |                            | Reference  |         |                  | Reference |         |
|                                                  | Present                    | 12.31                      | 9.68–15.65 | <0.001  | 4.13             | 3.14–5.42 | <0.001  |
| Bronchitis or pneumonia                          | Absent                     |                            | Reference  |         |                  | Reference |         |
|                                                  | Present                    | 1.68                       | 1.20–2.36  | 0.002   | 2.04             | 1.46–2.84 | <0.001  |

Note. PR: prevalence ratio, CI: confidence interval, HTP: heated tobacco product.

The sampling weights, which were scaled such that the total amounted to 26,000 (the original number of respondents), were predicted from a logistic model in which we adjusted for area of residence, marital status, education status, home-ownership status, self-rated health, and smoking status in individuals aged 20–80 years; and area of residence, education status, home-ownership status, and self-rated health (omitting marital and smoking status) in individuals aged 15–19 years, to adjust for the difference in respondents between the current internet survey and the 2016 Comprehensive Survey of Living Conditions in Japan. All CIs and *P* values were based on the robust variance estimator to account for the inverse-probability weighting.

**Table S2 Variance inflation factors for the evaluation of multicollinearity**

| Characteristics                                  | N = 18,839          | VIF       |
|--------------------------------------------------|---------------------|-----------|
| Exposure to secondhand aerosols                  | Absent              | Reference |
|                                                  | Present             | 1.07      |
| Age                                              | 15–29               | 1.78      |
|                                                  | 30–44               | 1.49      |
|                                                  | 45–59               | Reference |
|                                                  | 60–80               | 1.68      |
| Sex                                              | Male                | Reference |
|                                                  | Female              | 1.19      |
| Education status                                 | High school or less | Reference |
|                                                  | College or more     | 1.06      |
| Marital status                                   | Married             | Reference |
|                                                  | Not married         | 2.01      |
|                                                  | Widowed/divorced    | 1.31      |
| Household size                                   | Living alone        | Reference |
|                                                  | Living with others  | 1.48      |
| Household-equivalent income                      | 1st quartile        | Reference |
|                                                  | 2nd quartile        | 1.63      |
|                                                  | 3rd quartile        | 1.65      |
|                                                  | 4th quartile        | 1.68      |
|                                                  | Unanswered          | 1.66      |
| Combustible cigarette use                        | Never               | Reference |
|                                                  | Past                | 1.40      |
| HTP use                                          | Never               | Reference |
|                                                  | Past                | 1.19      |
| Other tobacco product use                        | Never               | Reference |
|                                                  | Past                | 1.31      |
| Exposure to secondhand smoke over the past month | Absent              | Reference |
|                                                  | Present             | 1.03      |
| Asthma                                           | Absent              | Reference |
|                                                  | Present             | 1.09      |
| Bronchitis or pneumonia                          | Absent              | Reference |
|                                                  | Present             | 1.10      |
| Mean                                             |                     | 1.41      |

Note. VIF: variance inflation factor, CI: confidence interval, HTP: heated tobacco products.

Figure S1 Flow diagram of the study

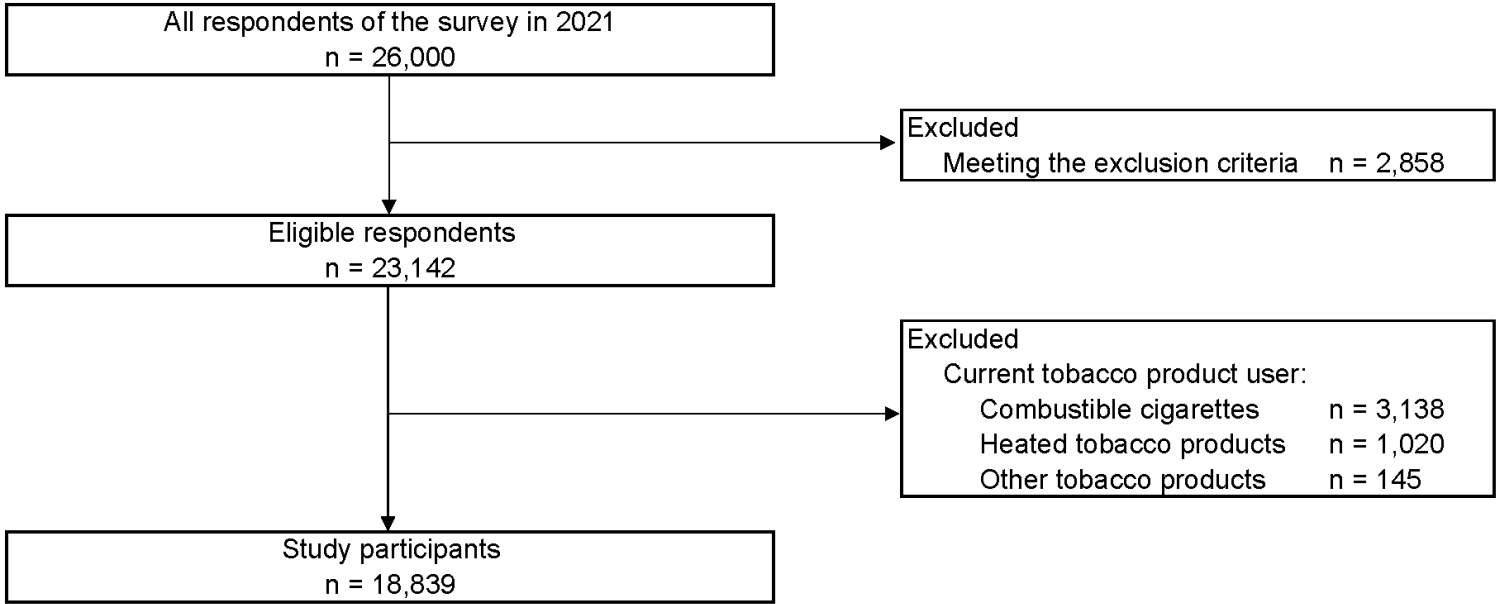

Supplement: bmjopen-2022-065322supp001_data_supplement.pdf [file bmjopen-2022-065322supp001_data_supplement.pdf]
